# Supplementary material for: High-dispersion Co/N/C ultra-thin carbon nanosheets modified with trace Ce as efficient oxygen reduction reaction catalysts
Source: Royal Society of Chemistry journal article supplement (doi:10.1039/d3nj00108c), 2023-01-01
Supplement: d3nj00108c7.pdf [file d3nj00108c7.pdf]

## Supporting Information

# High dispersion Co-N/C ultra-thin carbon nanosheets modified with trace Ce as efficient oxygen reduction reaction catalysts

Xiaoqi Zhu, Shengnan Xie, Xin Fu, Sheng Zhu, Yulin Min, Qunjie Xu, Qiaoxia Li\*

Shanghai Key Laboratory of Materials Protection and Advanced Materials in Electric Power, College of Environmental and Chemical Engineering, Shanghai University of Electric Power, Shanghai, 200090, China

\*Correspondence address: e-mail: liqiaoxia@shiep.edu.cn

### Supporting Figures

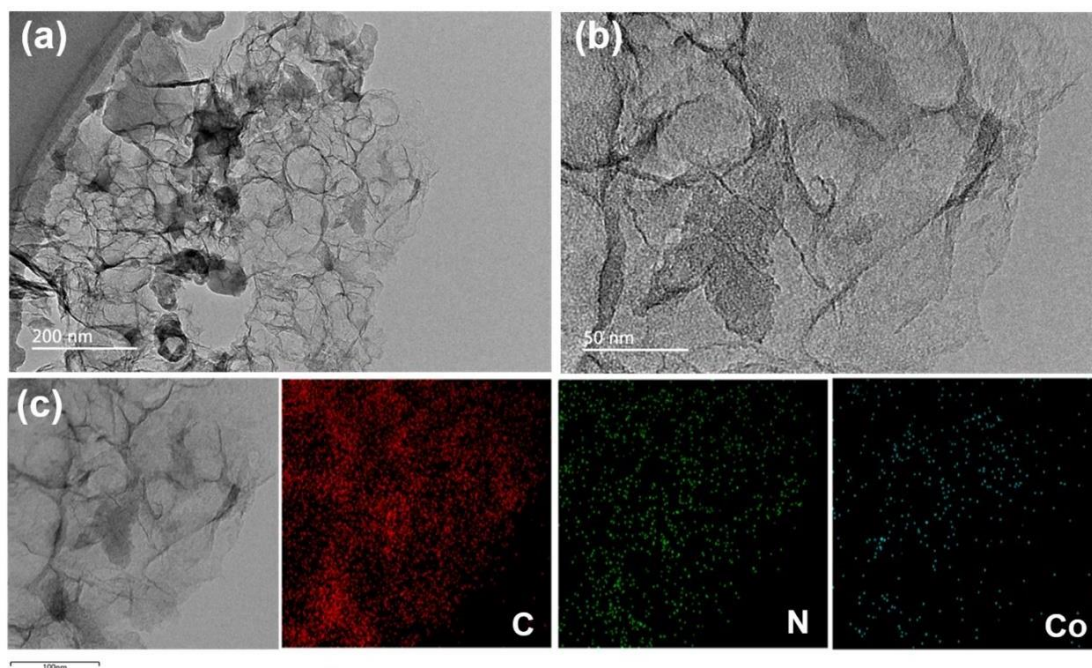

Fig. S1(a) TEM of Co/N/C (b) HRTEM image of Co/N/C (c) STEM and element distribution diagrams of Co/N/C.

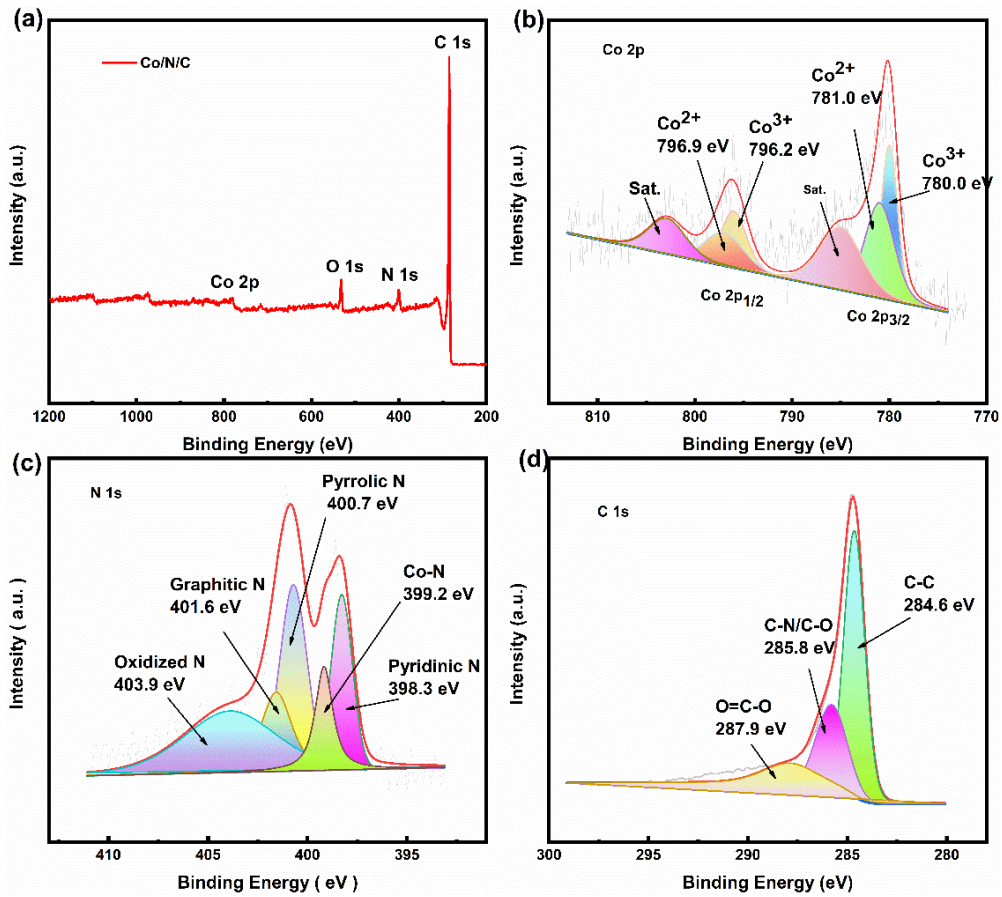

Fig. S2 (a) XPS survey spectra, (b) Detailed Co 2p spectra of Co/N/C, (c) Detailed N 1s spectra of Co/N/C, (d) Detailed C 1s spectra of Co/N/C

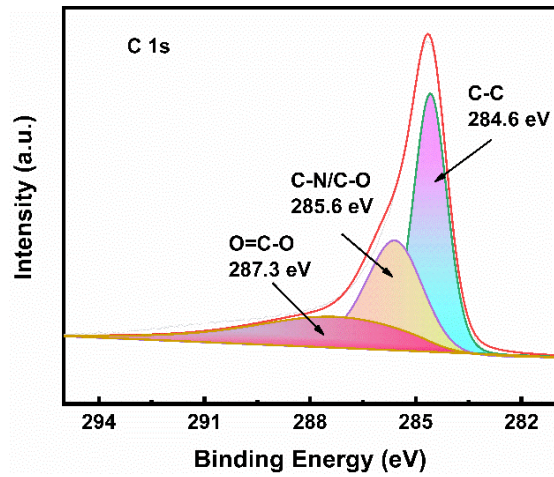

Fig. S3 Detailed C 1s spectra of Ce-Co/N/C

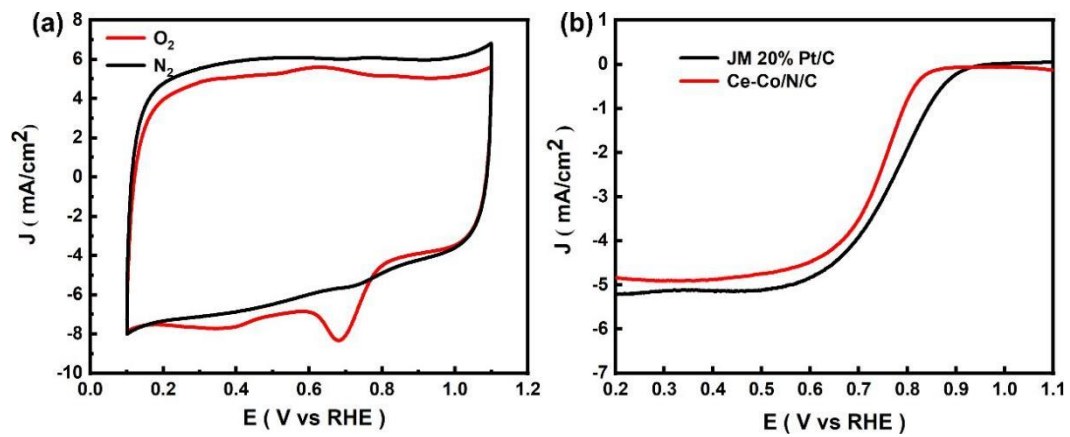

Fig. S4 Ce-Co/N/C polarization curve at 1600 rpm in 0.1 M HClO<sub>4</sub> with a rotating disk electrode (RDE)

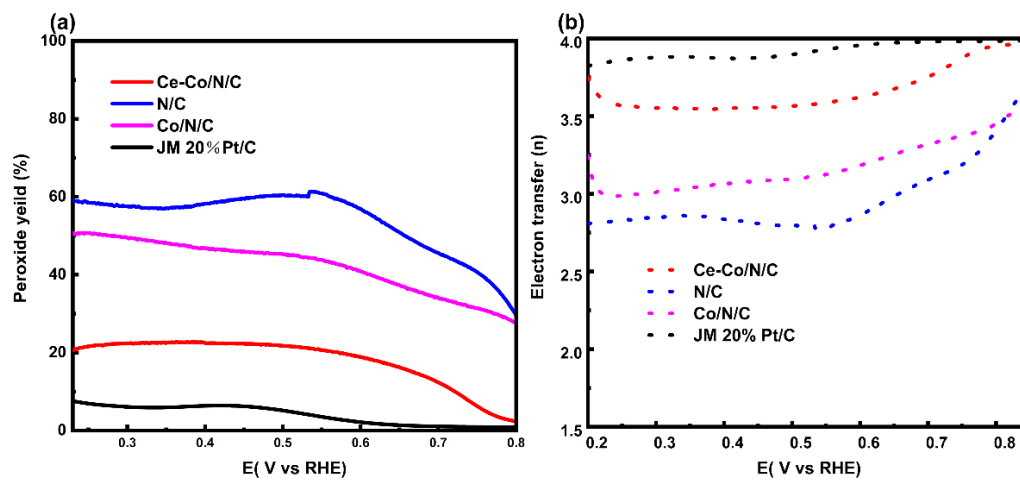

Fig. S5. (a) The H<sub>2</sub>O<sub>2</sub> yield and (b) Electron transfer number by rotating ring disk electrode (RRDE).

## Supporting Tables

**Table S1.** Summary of the N<sub>2</sub> adsorption and desorption for the applied samples.

| Samples              | BET SSA(m <sup>2</sup> g <sup>-1</sup> ) | Pore Volume (cm <sup>3</sup> g <sup>-1</sup> ) | Pore Size (nm) |
|----------------------|------------------------------------------|------------------------------------------------|----------------|
| Ce-Co/N/C            | 442.4887                                 | 0.299808                                       | 2.70           |
| Co/N/C               | 342.5485                                 | 0.352603                                       | 4.10           |
| N/C                  | 178.6805                                 | 0.117590                                       | 2.63           |
| Ce-Co/N/C-no<br>NaCl | 232.7048                                 | 0.152058                                       | 2.61           |

**Table S2.** Element analysis of the applied samples based on XPS characterizations.

| Sample    | C (at%) | N (at%) | O (at%) | Co (at%) | Ce (at%) |
|-----------|---------|---------|---------|----------|----------|
| Ce-Co/N/C | 82.04   | 11.1    | 5.38    | 0.77     | 0.38     |
| Co/N/C    | 87.93   | 6.36    | 4.86    | 0.84     |          |

Table S3. Percentage content of different types of nitrogen based on XPS integral area

| Sample    | Pyridinic-N | Co-N   | Pyrrolic-N | Graphitic-N | Oxide-N |
|-----------|-------------|--------|------------|-------------|---------|
| Ce-Co/N/C | 25.17%      | 18.16% | 17.75%     | 27.85%      | 11.07%  |
| Co/N/C    | 18.02%      | 11.94% | 24.53%     | 14.47%      | 31.04%  |

Table S4. The corresponding parameters from the equivalent circuit simulation.

| Sample    | Rs (ohm) | Rct (ohm) |
|-----------|----------|-----------|
| Ce-Co/N/C | 5.803    | 38.74     |
| Co/N/C    | 5.519    | 41.86     |
| Pt/C      | 4.307    | 45.28     |

**Table S5.** Comparison of ORR electrocatalytic activities of non-precious materials in 0.1 M KOH solution.

| Catalyst                                 | $E_{\text{onset}}$ (V) | $E_{1/2}$ (V) | Reference |
|------------------------------------------|------------------------|---------------|-----------|
| Ce-CoNCNs                                | 1.02                   | 0.89          | This work |
| Co@NPC/C-MWCNTs                          | 0.93                   | 0.79          | 1         |
| Co@Co-N-C-A<br>NHs                       | 0.98                   | 0.85          | 2         |
| Co <sub>2</sub> N <sub>0.67</sub> -BHPC  | 0.93                   | 0.86          | 3         |
| Cu-N-C-ICHP<br>NDs                       | 0.97                   | 0.85          | 4         |
| Co-CeO <sub>2</sub> /C                   | 0.75                   | 0.92          | 5         |
| Co-C <sub>3</sub> N <sub>4</sub> /CNT    | 0.90                   | 0.85          | 6         |
| Nd-Co@NC                                 | 1.03                   | 0.85          | 7         |
| Fe <sub>SA</sub> /FeO <sub>NC</sub> /NSC | 0.99                   | 0.86          | 8         |
| NPC-Fe                                   | 0.95                   | 0.82          | 9         |
| Fe/N/S-CNTs                              | 0.987                  | 0.887         | 10        |

## REFERENCES

1. Z. Liu, D. Ye, X. Zhu, S. Wang, Y. Zou, L. Lan, R. Chen, Y. Yang and Q. Liao, *Chemical Engineering Journal*, 2022, **432**, 134192.
2. A. Aijaz, J. Masa, C. Rösler, W. Xia, P. Weide, A. J. R. Botz, R. A. Fischer, W. Schuhmann and M. Muhler, *Angewandte Chemie International Edition*, 2016, **55**, 4087-4091.
3. X. Lv, Z. Xiao, H. Wang, X. Wang, L. Shan, F. Wang, C. Wei, X. Tang and Y. Chen, *Journal of Energy Chemistry*, 2021, **54**, 626-638.
4. T. Wang, R. Yang, N. Shi, J. Yang, H. Yan, J. Wang, Z. Ding, W. Huang, Q. Luo, Y. Lin, J. Gao and M. Han, *Small*, 2019, **15**, 1902410.
5. Z. Liu, J. Wan, M. Li, Z. Shi, J. Liu and Y. Tang, *Nanoscale*, 2022, **14**, 1997-2003.
6. Y. Zheng, Y. Jiao, Y. Zhu, Q. Cai, A. Vasileff, L. H. Li, Y. Han, Y. Chen and S.-Z. Qiao, *Journal of the American Chemical Society*, 2017, **139**, 3336-3339.
7. C. Fan, X. Wang, X. Wu, Y. Chen, Z. Wang, M. Li, D. Sun, Y. Tang and G. Fu, *Advanced Energy Materials*, 2023, **13**, 2203244.
8. Y. Lei, F. Yang, H. Xie, Y. Lei, X. Liu, Y. Si and H. Wang, *Journal of Materials Chemistry A*, 2020, **8**, 20629-20636.
9. T. Yang, Y. Chen, Y. Liu, X. Liu and S. Gao, *Chinese Chemical Letters*, 2022, **33**, 2171-2177.
10. H. Jin, H. Zhou, W. Li, Z. Wang, J. Yang, Y. Xiong, D. He, L. Chen and S. Mu, *Journal of Materials Chemistry A*, 2018, **6**, 20093-20099.
