# Supplementary figures and images for: High-dispersion Co/N/C ultra-thin carbon nanosheets modified with trace Ce as efficient oxygen reduction reaction catalysts
Source: Royal Society of Chemistry journal article supplement (doi:10.1039/d3nj00108c), 2023-01-01

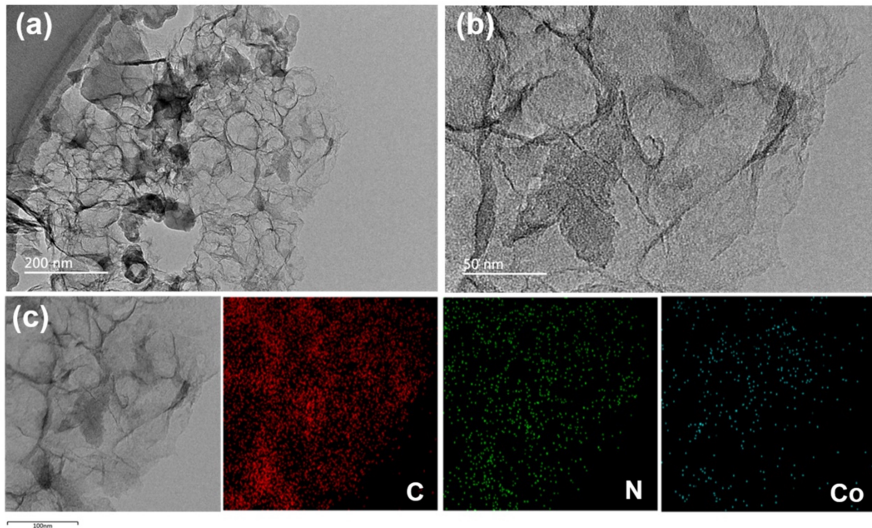

Supplement: d3nj00108c2.pdf [file d3nj00108c2.pdf]

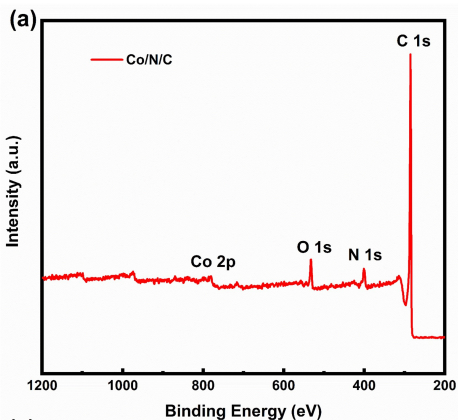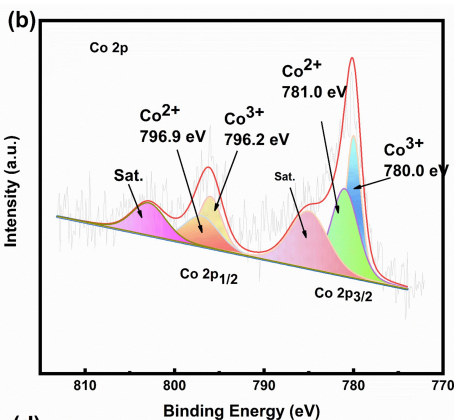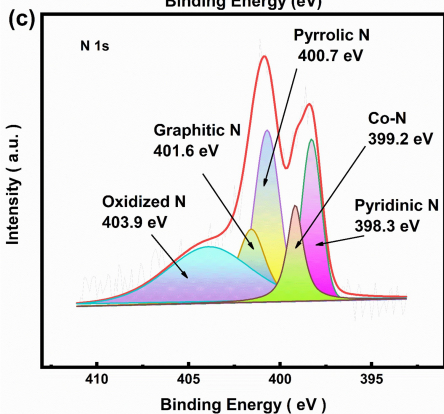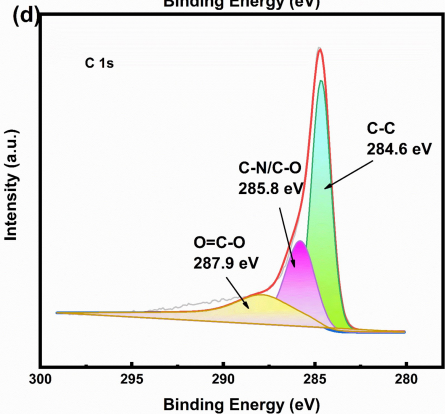

Supplement: d3nj00108c3.pdf [file d3nj00108c3.pdf]

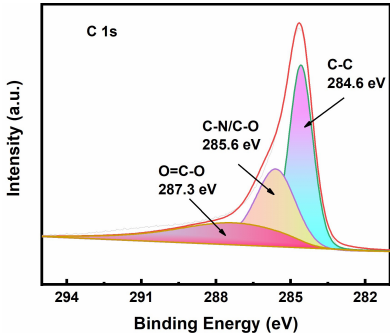

Supplement: d3nj00108c4.pdf [file d3nj00108c4.pdf]

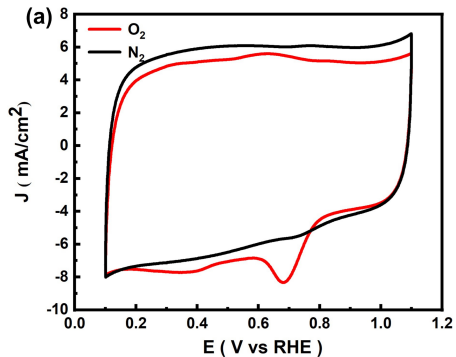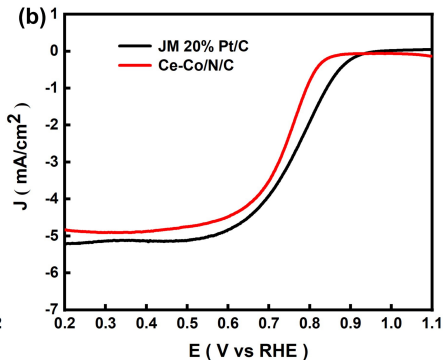

Supplement: d3nj00108c5.pdf [file d3nj00108c5.pdf]

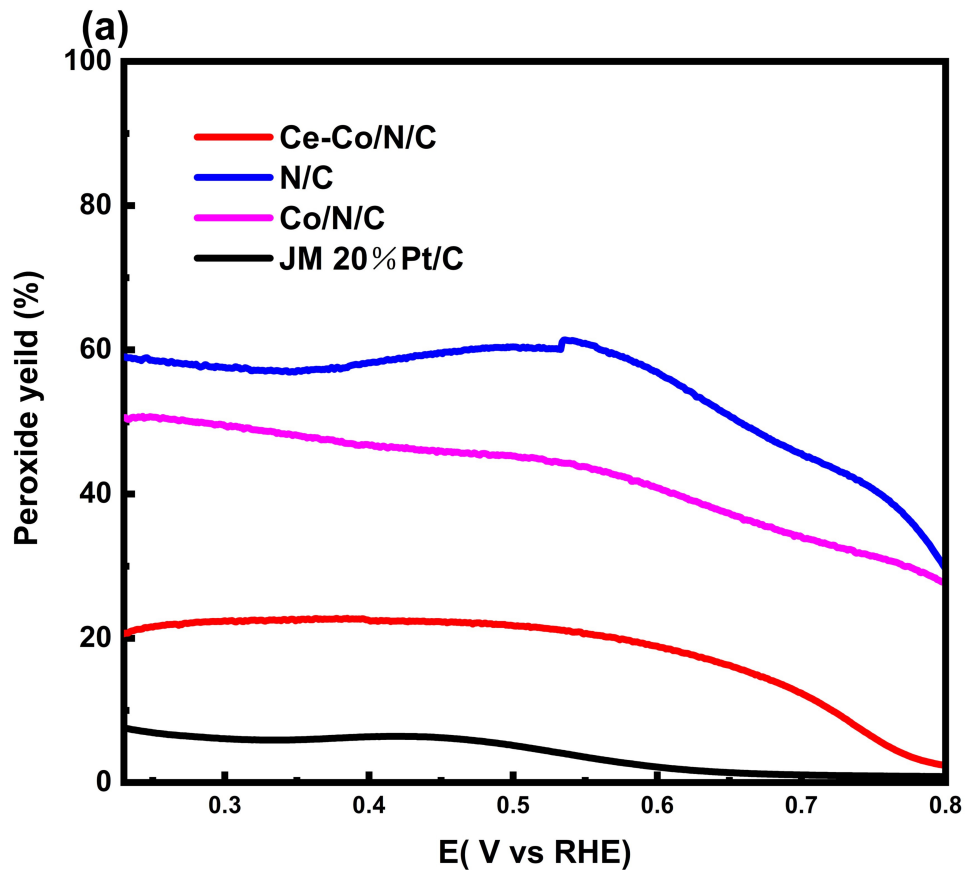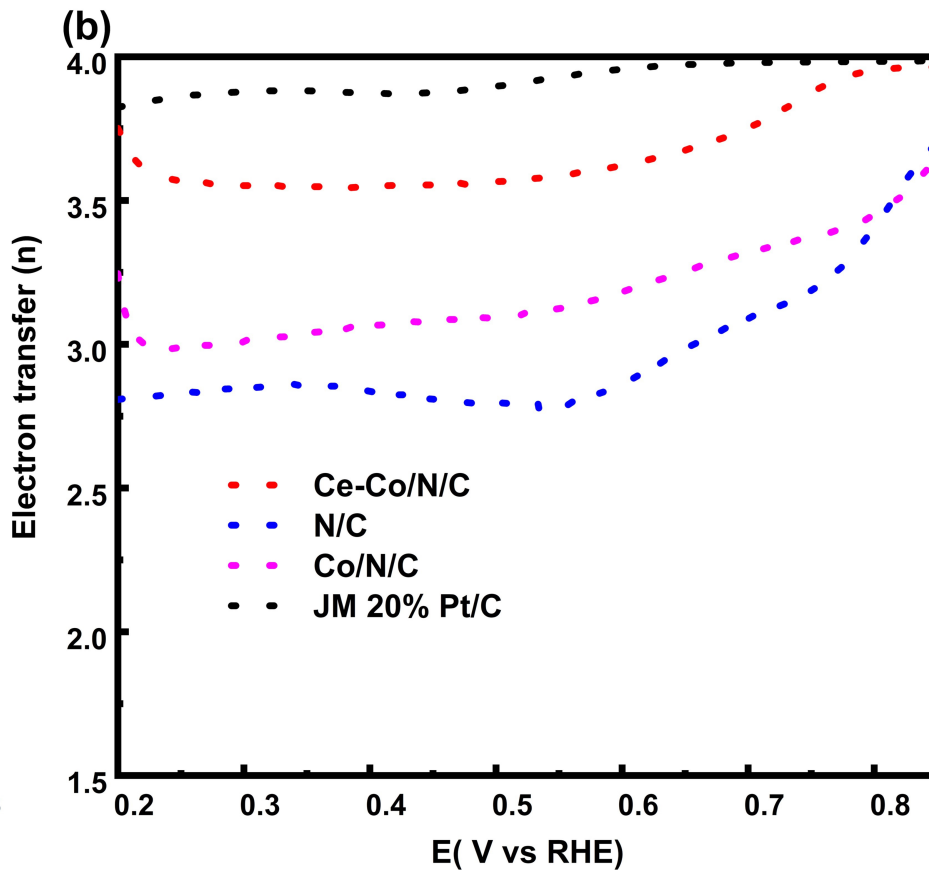

Supplement: d3nj00108c6.pdf [file d3nj00108c6.pdf]
